# Supplementary material for: Valine-279 Deletion–Mutation on Arginine Vasopressin Receptor 2 Causes Obstruction in G-Protein Binding Site: A Clinical Nephrogenic Diabetes Insipidus Case and Its Sub-Molecular Pathogenic Analysis
Source: PubMed Central journal article supplement (PMC8002004; doi:10.3390/biomedicines9030301), 2021-03-15
Supplement: biomedicines-09-00301-s001.pdf [file biomedicines-09-00301-s001.pdf]

**Table S1.** Primers of human *AVPR2* and *AQP2* used for Sanger sequencing.

| Primer      | Sequence               | Size (bp) |
|-------------|------------------------|-----------|
| hAQP2-1F    | AAAGAGAGCGATAGAGTGCG   | 475       |
| hAQP2-1R    | CCTTGTGGATGGCAAAGTTG   |           |
| hAQP2-2F    | GAAGAAGGGATCAGTCGTTG   | 475       |
| hAQP2-2R    | TGGGGTATCTAGGAGTCAAAC  |           |
| hAQP2-3F    | TCAAGAGGAACAGACACCC    | 497       |
| hAQP2-3R    | AAGCTGTTGTCCATCCTCATTC |           |
| hAQP2-4F    | TAACCCCGCACTGACAAGG    | 522       |
| hAQP2-4R    | ACGTCCAGGAAGCAGCTAC    |           |
| hAVPR2-1F   | TGACCATCCCTCTCAATCTTC  |           |
| hAVPR2-1R   | CTCCAGGAAAGCCATGTTATG  | 474       |
| hAVPR2-2.1F | AACATGGCTTTCCTGGAGTCC  |           |
| hAVPR2-2.1R | AGGCATACATGCCACCATC    | 483       |
| hAVPR2-2.2F | CCCATACACGTCTTCATTGGC  |           |
| hAVPR2-2.2R | GCACCAGACTGGCATGAATC   | 496       |
| hAVPR2-2.3F | ACCTATGTCACCTGGATTGCC  |           |
| hAVPR2-2.3R | ACACGCTGCTGCTGAAAGATGC | 494       |
| hAVPR2-3F   | ACCCAACCTAGATCCTCCAC   |           |
| hAVPR2-3R   | CTGAAGCTCTCCTCATACAGC  | 436       |

**Table S2.** All simulation systems parameters.

| Simulation System    | Simulation Time ( $\mu$ s) | Total Number of Atoms | Number of Sodium Ions | Number of Chloride Ions | Number of Waters | Number of Lipids |
|----------------------|----------------------------|-----------------------|-----------------------|-------------------------|------------------|------------------|
| AVPR2-WT             | 1.5 $\times$ 2             | 79588                 | 92                    | 101                     | 21294            | 240              |
| AVPR2-D136A          | 1.5 $\times$ 2             | 78578                 | 92                    | 102                     | 20958            | 240              |
| AVPR2- $\Delta$ V279 | 1.5 $\times$ 2             | 78266                 | 92                    | 101                     | 20856            | 240              |
